# Supplementary material for: From a Well-Defined Organozinc Precursor to Diverse Luminescent Coordination Polymers Based on Zn(II)-Quinolinate Building Units Interconnected by Mixed Ligand Systems
Source: MDPI journal article supplement (doi:10.3390/molecules26237402), 2021-12-06
Supplement: s1 [file s1]

## Supporting Information

Article

# From a Well-Defined Organozinc Precursor to Diverse Luminescent Coordination Polymers Based on Zn(II)-Quinolate Building Units Interconnected by Mixed Ligand Systems

Katarzyna Sołtys-Brzostek <sup>1</sup>, Kamil Sokołowski <sup>1</sup>, Iwona Justyniak <sup>1</sup>, Michał K. Leszczyński <sup>1,2</sup>,  
Natalia Olejnik-Fehér <sup>1</sup> and Janusz Lewiński <sup>1,2,\*</sup>

<sup>1</sup> Institute of Physical Chemistry, Polish Academy of Sciences, Kasprzaka 44/52, 01-224 Warsaw, Poland; ksołtys@ichf.edu.pl (K.S.-B.); ks623@cam.ac.uk (K.S.); ijustyniak@ichf.edu.pl (I.J.); leszczyński.m@hotmail.com (M.K.L.); nolejnik@ichf.edu.pl (N.O.-F.)

<sup>2</sup> Faculty of Chemistry, Warsaw University of Technology, Noakowskiego 3, 00-664 Warsaw, Poland

\* Correspondence: lewin@ch.pw.edu.pl

### X-Ray crystallography

The crystals were selected under Paratone-N oil, mounted on the nylon loops and positioned in the cold stream on the diffractometer. The X-ray data for complex **CP1** were collected on a Nonius Kappa CCD diffractometer using graphite monochromated MoK $\alpha$  radiation ( $\lambda = 0.71073$  Å). The data were processed with *DENZO* and *SCALEPACK* (*HKL2000* package)<sup>[1]</sup>. The X-ray data for complexes **CP2**, **CP3**, **HP4**, and **CP5** were collected at 100(2) K on a SuperNova Agilent diffractometer using MoK $\alpha$  radiation ( $\lambda = 0.71073$  Å). The data were processed with *CrysAlisPro*.<sup>[2]</sup> Structures were solved by direct methods and refined using *SHELXL-2016/4*.<sup>[3]</sup> All non-hydrogen atoms were refined with anisotropic displacement parameters. Hydrogen atoms were added to the structure model at geometrically idealized coordinates and refined as riding atoms.

For compounds **CP2**, **CP3** and **HP4** we observed significant residual electron densities within the pores from the solvent molecule. The solvent molecules appeared to be highly disordered and it was difficult to reliably modeled their positions and distribution. Therefore, the *SQUEEZE* function of *PLATON* <sup>[4]</sup> was used to eliminate the contribution of the electron density in the solvent region from the intensity data.

Due to weak or absent intensity of some reflections, the structure **HP4** was fully modeled but has a high wR. Therefore, the geometric parameters were not analyzed.

Crystallographic data (excluding structure factors) have been deposited with the Cambridge Crystallographic Data Centre. Copies of the data can be obtained free of charge on application to CCDC, 12 Union Road, Cambridge CB2 1EZ, UK (fax: +44 1223 336033; e-mail: [deposit@ccdc.cam.ac.uk](mailto:deposit@ccdc.cam.ac.uk)).

CCDC: CP1-2092607, CP2-2092608, CP3-2092609, HP4 -2092610 and CP5 CCDC- 2092611

**Table S1.** Crystal data and structure refinement details for **CP1**.

|                                   |                                             |                         |
|-----------------------------------|---------------------------------------------|-------------------------|
| Identification code               | CP1 CCDC-2092607                            |                         |
| Empirical formula                 | $C_{42}H_{42}N_4O_9Zn_2$                    |                         |
| Formula weight                    | 877.53                                      |                         |
| Temperature                       | 100(2) K                                    |                         |
| Wavelength                        | 0.71073 Å                                   |                         |
| Crystal system                    | monoclinic                                  |                         |
| Space group                       | P 21/c                                      |                         |
| Unit cell dimensions              | $a = 10.6080(7)$ Å                          | $a = 90^\circ$ .        |
|                                   | $b = 9.8830(8)$ Å                           | $b = 90.954(4)^\circ$ . |
|                                   | $c = 37.972(3)$ Å                           | $g = 90^\circ$ .        |
| Volume                            | $3980.4(5)$ Å <sup>3</sup>                  |                         |
| Z                                 | 4                                           |                         |
| Density (calculated)              | 1.464 Mg/m <sup>3</sup>                     |                         |
| Absorption coefficient            | 1.266 mm <sup>-1</sup>                      |                         |
| F(000)                            | 1816                                        |                         |
| Crystal size                      | 0.21 x 0.15 x 0.05 mm <sup>3</sup>          |                         |
| Theta range for data collection   | 2.129 to 22.996°.                           |                         |
| Index ranges                      | -11 ≤ h ≤ 11, -10 ≤ k ≤ 10, -41 ≤ l ≤ 41    |                         |
| Reflections collected             | 7966                                        |                         |
| Independent reflections           | 4801 [R(int) = 0.0693]                      |                         |
| Completeness to theta = 22.996°   | 86.8 %                                      |                         |
| Absorption correction             | Semi-empirical from equivalents             |                         |
| Max. and min. transmission        | 0.939 and 0.796                             |                         |
| Refinement method                 | Full-matrix least-squares on F <sup>2</sup> |                         |
| Data / restraints / parameters    | 4801 / 29 / 514                             |                         |
| Goodness-of-fit on F <sup>2</sup> | 1.130                                       |                         |
| Final R indices [I > 2σ(I)]       | R1 = 0.1072, wR2 = 0.1915                   |                         |
| R indices (all data)              | R1 = 0.1663, wR2 = 0.2107                   |                         |
| Extinction coefficient            | n/a                                         |                         |
| Largest diff. peak and hole       | 0.986 and -0.454 e.Å <sup>-3</sup>          |                         |

**Table S2.** Crystal data and structure refinement details for **CP2**.

|                                         |                                                                    |                            |
|-----------------------------------------|--------------------------------------------------------------------|----------------------------|
| Identification code                     | CP2 CCDC-2092608                                                   |                            |
| Empirical formula                       | $C_{53}H_{53}N_7O_{10}Zn_2$                                        |                            |
| Formula weight                          | 1078.76                                                            |                            |
| Temperature                             | 100(2) K                                                           |                            |
| Wavelength                              | 0.71073 Å                                                          |                            |
| Crystal system                          | Monoclinic                                                         |                            |
| Space group                             | P 21/n                                                             |                            |
| Unit cell dimensions                    | $a = 10.260(5)$ Å                                                  | $a = 90.000(5)^\circ$      |
|                                         | $b = 21.650(5)$ Å                                                  | $b = 91.910(5)^\circ$      |
|                                         | $c = 25.883(5)$ Å                                                  | $\gamma = 90.000(5)^\circ$ |
| Volume                                  | $5746(3)$ Å <sup>3</sup>                                           |                            |
| Z                                       | 4                                                                  |                            |
| Density (calculated)                    | 1.247 Mg/m <sup>3</sup>                                            |                            |
| Absorption coefficient                  | 0.893 mm <sup>-1</sup>                                             |                            |
| F(000)                                  | 2240                                                               |                            |
| Crystal size                            | 0.17 x 0.12 x 0.06 mm <sup>3</sup>                                 |                            |
| Theta range for data collection         | 1.226 to 25.677°.                                                  |                            |
| Index ranges                            | $-12 \leq h \leq 11$ , $-26 \leq k \leq 25$ , $-27 \leq l \leq 31$ |                            |
| Reflections collected                   | 10862                                                              |                            |
| Independent reflections                 | 10862 [R(int) = 0.108]                                             |                            |
| Completeness to $\theta = 25.677^\circ$ | 99.9 %                                                             |                            |
| Absorption correction                   | Semi-empirical from equivalents                                    |                            |
| Max. and min. transmission              | 0.939 and 0.796                                                    |                            |
| Refinement method                       | Full-matrix least-squares on F <sup>2</sup>                        |                            |
| Data / restraints / parameters          | 10862 / 0 / 702                                                    |                            |
| Goodness-of-fit on F <sup>2</sup>       | 1.099                                                              |                            |
| Final R indices [I > 2σ(I)]             | R1 = 0.0733, wR2 = 0.2136                                          |                            |
| R indices (all data)                    | R1 = 0.0866, wR2 = 0.2265                                          |                            |
| Largest diff. peak and hole             | 0.862 and -0.882 e.Å <sup>-3</sup>                                 |                            |

**Table S3.** Crystal data and structure refinement details for **CP3**.

|                                   |                                             |                  |
|-----------------------------------|---------------------------------------------|------------------|
| Identification code               | CP3 CCDC-2092609                            |                  |
| Empirical formula                 | $C_{47}H_{37}N_5O_8Zn_2$                    |                  |
| Formula weight                    | 930.55                                      |                  |
| Temperature                       | 100(2) K                                    |                  |
| Wavelength                        | 0.71073 Å                                   |                  |
| Crystal system                    | triclinic                                   |                  |
| Space group                       | P -1                                        |                  |
| Unit cell dimensions              | a = 13.969(2) Å                             | a = 85.971(12)°  |
|                                   | b = 14.456(3) Å                             | b = 63.139(13)°. |
|                                   | c = 14.6261(14) Å                           | g = 73.145(17)°. |
| Volume                            | 2515.2(8) Å <sup>3</sup>                    |                  |
| Z                                 | 2                                           |                  |
| Density (calculated)              | 1.229 Mg/m <sup>3</sup>                     |                  |
| Absorption coefficient            | 1.005 mm <sup>-1</sup>                      |                  |
| F(000)                            | 956                                         |                  |
| Crystal size                      | 0.19 x 0.10 x 0.08 mm <sup>3</sup>          |                  |
| Theta range for data collection   | 3.043 to 25.682°.                           |                  |
| Index ranges                      | -16<=h<=17, -17<=k<=15, -17<=l<=17          |                  |
| Reflections collected             | 14812                                       |                  |
| Independent reflections           | 8248 [R(int) = 0.1116]                      |                  |
| Completeness to theta = 25.682°   | 86.93 %                                     |                  |
| Absorption correction             | Semi-empirical from equivalents             |                  |
| Max. and min. transmission        | 0.886 and 0.923                             |                  |
| Refinement method                 | Full-matrix least-squares on F <sup>2</sup> |                  |
| Data / restraints / parameters    | 8248 / 0 / 561                              |                  |
| Goodness-of-fit on F <sup>2</sup> | 0.931                                       |                  |
| Final R indices [I>2sigma(I)]     | R1 = 0.1044, wR2 = 0.2145                   |                  |
| R indices (all data)              | R1 = 0.2262, wR2 = 0.2723                   |                  |
| Largest diff. peak and hole       | 1.101 and -0.540 e.Å <sup>-3</sup>          |                  |

**Table S4.** Crystal data and structure refinement details for **HP4**.

|                                   |                                             |                 |
|-----------------------------------|---------------------------------------------|-----------------|
| Identification code               | HP4                                         | CCDC- 2092610   |
| Empirical formula                 | $C_{114}H_{98}N_{14}O_{20}Zn_4$             |                 |
| Formula weight                    | 2245.54                                     |                 |
| Temperature                       | 100(2) K                                    |                 |
| Wavelength                        | 0.71073 Å                                   |                 |
| Crystal system                    | monoclinic                                  |                 |
| Space group                       | C 2/c                                       |                 |
| Unit cell dimensions              | a = 18.5180(15) Å                           | a = 90°         |
|                                   | b = 18.500(3) Å                             | b = 94.015(6)°. |
|                                   | c = 34.4199(17) Å                           | g = 90°.        |
| Volume                            | 11763(2) Å <sup>3</sup>                     |                 |
| Z                                 | 4                                           |                 |
| Density (calculated)              | 1.268 Mg/m <sup>3</sup>                     |                 |
| Absorption coefficient            | 0.875 mm <sup>-1</sup>                      |                 |
| F(000)                            | 4640                                        |                 |
| Crystal size                      | 0.18 x 0.09 x 0.06 mm <sup>3</sup>          |                 |
| Theta range for data collection   | 3.144 to 24.499°.                           |                 |
| Index ranges                      | -24 ≤ h ≤ 23, -14 ≤ k ≤ 24, -25 ≤ l ≤ 46    |                 |
| Reflections collected             | 9748                                        |                 |
| Independent reflections           | 9748 [R(int) = 0.0912]                      |                 |
| Completeness to theta = 24.499°   | 99.6 %                                      |                 |
| Absorption correction             | Semi-empirical from equivalents             |                 |
| Max. and min. transmission        | 0.910 and 0.949                             |                 |
| Refinement method                 | Full-matrix least-squares on F <sup>2</sup> |                 |
| Data / restraints / parameters    | 9748/ 39 / 708                              |                 |
| Goodness-of-fit on F <sup>2</sup> | 1.237                                       |                 |
| Final R indices [I > 2sigma(I)]   | R1 = 0.1477, wR2 = 0.3767                   |                 |
| R indices (all data)              | R1 = 0.2041, wR2 = 0.4077                   |                 |
| Largest diff. peak and hole       | 2.818 and - -0.806 e.Å <sup>-3</sup>        |                 |

**Table S4.** Crystal data and structure refinement details for **CP5**.

|                                         |                                                                    |                             |
|-----------------------------------------|--------------------------------------------------------------------|-----------------------------|
| Identification code                     | CP5 CCDC- 2092611                                                  |                             |
| Empirical formula                       | $C_{17}H_{17}N_4O_5Zn$                                             |                             |
| Formula weight                          | 422.71                                                             |                             |
| Temperature                             | 100(2) K                                                           |                             |
| Wavelength                              | 0.71073 Å                                                          |                             |
| Crystal system                          | triclinic                                                          |                             |
| Space group                             | P -1                                                               |                             |
| Unit cell dimensions                    | $a = 9.921(3)$ Å                                                   | $a = 87.37(3)^\circ$ .      |
|                                         | $b = 10.137(4)$ Å                                                  | $b = 73.13(3)^\circ$ .      |
|                                         | $c = 11.012(4)$ Å                                                  | $\gamma = 60.77(4)^\circ$ . |
| Volume                                  | $918.8(7)$ Å <sup>3</sup>                                          |                             |
| Z                                       | 2                                                                  |                             |
| Density (calculated)                    | $1.528$ Mg/m <sup>3</sup>                                          |                             |
| Absorption coefficient                  | $1.373$ mm <sup>-1</sup>                                           |                             |
| F(000)                                  | 434                                                                |                             |
| Crystal size                            | $0.18 \times 0.14 \times 0.10$ mm <sup>3</sup>                     |                             |
| Theta range for data collection         | $3.193$ to $29.064^\circ$ .                                        |                             |
| Index ranges                            | $-12 \leq h \leq 13$ , $-12 \leq k \leq 13$ , $-14 \leq l \leq 15$ |                             |
| Reflections collected                   | 6754                                                               |                             |
| Independent reflections                 | 4158 [ $R(\text{int}) = 0.0387$ ]                                  |                             |
| Completeness to $\theta = 29.064^\circ$ | 85.0 %                                                             |                             |
| Absorption correction                   | Semi-empirical from equivalents                                    |                             |
| Max. and min. transmission              | 0.794 and 0.872                                                    |                             |
| Refinement method                       | Full-matrix least-squares on $F^2$                                 |                             |
| Data / restraints / parameters          | 4158 / 175 / 291                                                   |                             |
| Goodness-of-fit on $F^2$                | 1.030                                                              |                             |
| Final R indices [ $I > 2\sigma(I)$ ]    | $R1 = 0.0481$ , $wR2 = 0.1124$                                     |                             |
| R indices (all data)                    | $R1 = 0.0575$ , $wR2 = 0.1186$                                     |                             |
| Largest diff. peak and hole             | $1.141$ and $-1.170$ e.Å <sup>-3</sup>                             |                             |

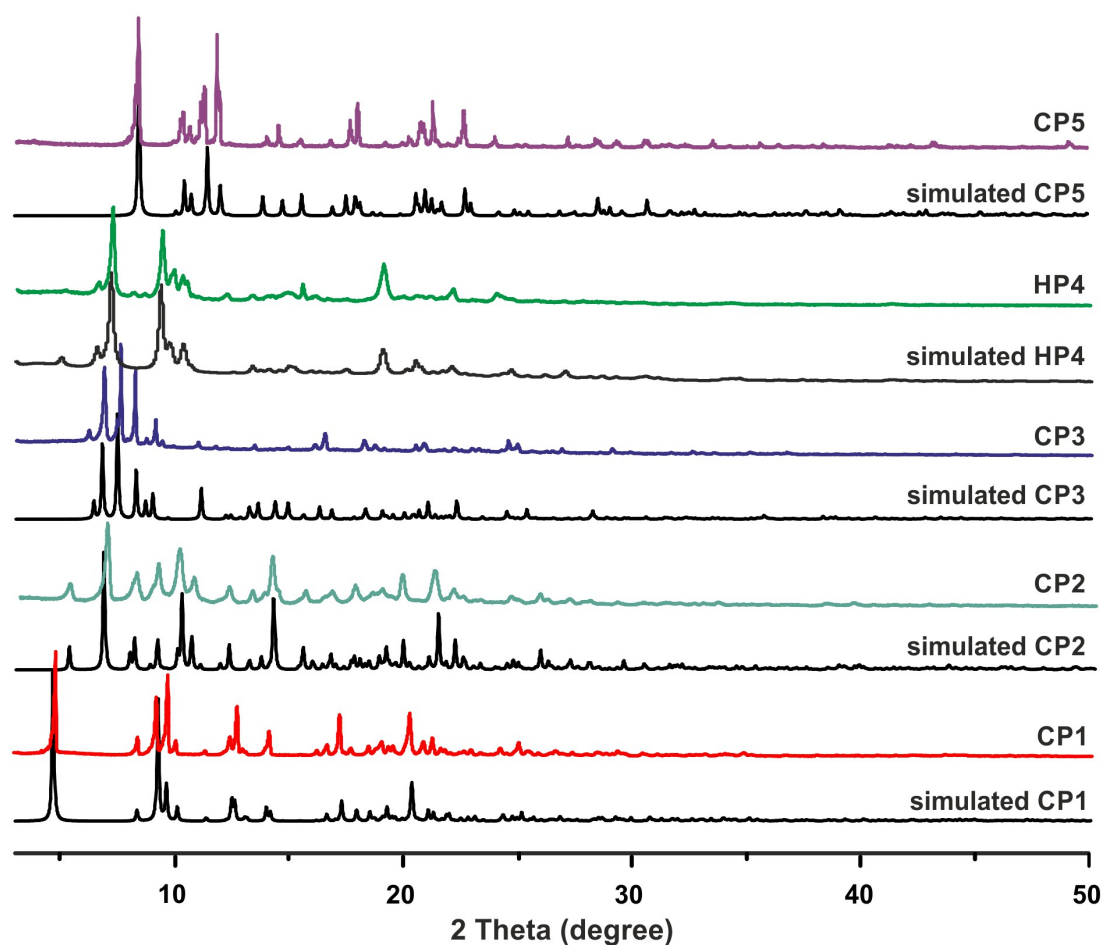

**Figure S1.** Experimental and simulated PXRD patterns for the **CP1-CP5** and **HP4** polymers. Simulation of PXRD pattern for **HP4** involved refinement of preferred orientation due to significant texturing in the sample.

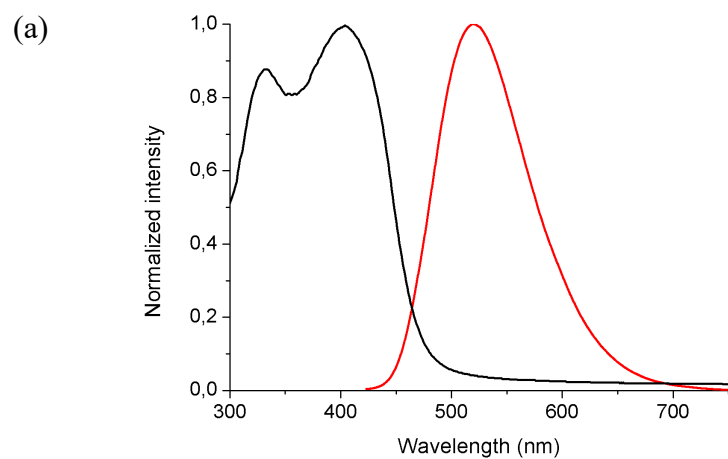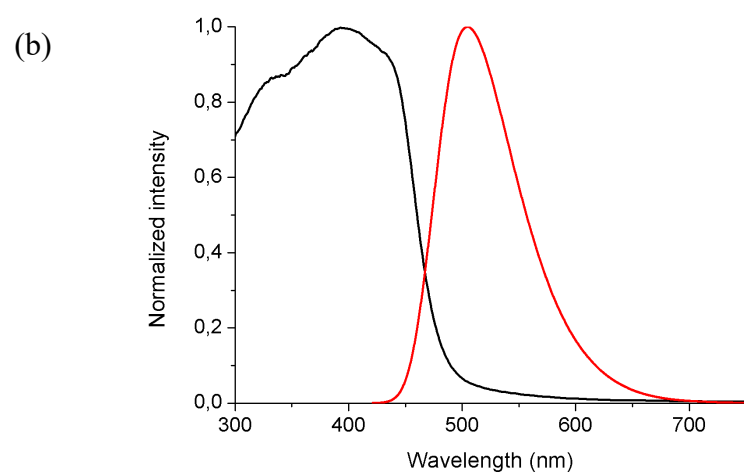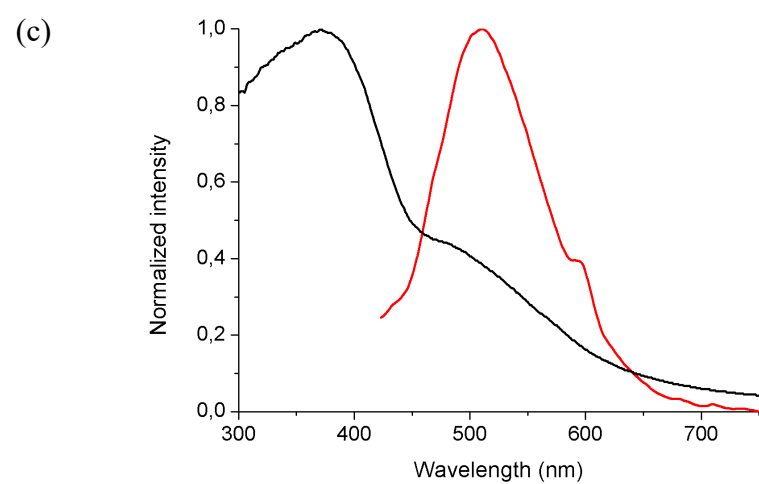



(d)

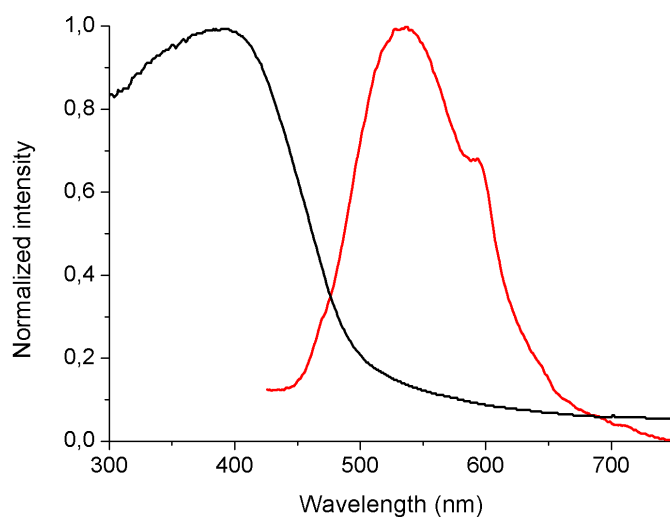

**Figure S2.** UV-Vis absorption measured in diffusive reflectance of polymer powders dispersed with BaSO<sub>4</sub> (black line) and the photoluminescence solid-state spectra of polymers measured with 400 nm excitation (red line): (a) CP1, (b) CP2, (c) CP3, (d) HP4.

## References

- 
- (1) Z. Otwinowski, W. Minor, *Methods Enzymol.* **1997**, 276, 307-326.
  - (2) Agilent Technologies, CrysAlisPro, Version 1.171.35.21b
  - (3) Sheldrick, G. M. A short history of SHELX. *Acta Crystallogr.* **2008**, 64A, 112-122.
  - (4) Spek, A. L. *Acta Crystallogr.* **2015**, C71, 9-18.
